# Supplementary material
Source: PubMed Central journal article supplement (PMC3748608)
Supplement: NIHMS441887-supplement-03.pdf [file NIHMS441887-supplement-03.pdf]

**Table 1** Normal control characteristics

| Control Identifier <sup>a</sup> | MiR Array Identifier <sup>b</sup> | Ages  |        |        | Gender | Race <sup>c</sup> |
|---------------------------------|-----------------------------------|-------|--------|--------|--------|-------------------|
|                                 |                                   | 0-3 y | 3-10 y | > 10 y |        |                   |
| MRNAC006                        | S37                               | 0.9   |        |        | M      | H                 |
| MRNAC010                        | S39                               | 1     |        |        | M      | AA                |
| MRNAC011                        | S41                               | 1     |        |        | F      | H                 |
| MRNAC015                        | S51                               | 0.8   |        |        | M      | AA                |
| MRNAC021                        | S60                               | 0.75  |        |        | M      | AA                |
| MRNAC023                        | S55                               | 1     |        |        | F      | H                 |
| MRNAC026                        | S77                               | 0.1   |        |        | M      | C                 |
| MRNAC016                        | S52                               |       | 7      |        | F      | H                 |
| MRNAC017                        | S53                               |       | 4      |        | M      | H                 |
| MRNAC020                        | S59                               |       | 4      |        | M      | AA                |
| MRNAC027                        | S78                               |       | 5      |        | M      | AA                |
| MRNAC001.1                      | S01                               |       |        | adult  | M      | C                 |
| MRNAC001.3a <sup>d</sup>        | S14                               |       |        | adult  | M      | C                 |
| MRNAC002                        | S05                               |       |        | adult  | F      | C                 |
| MRNAC003                        | S23                               |       |        | 18     | F      | H                 |
| MRNAC005                        | S36                               |       |        | 16     | M      | C                 |
| MRNAC008                        | S38                               |       |        | 15     | F      | AA                |
| MRNAC013                        | S42                               |       |        | 16     | F      | AA                |
| MRNAC018                        | S54                               |       |        | 12     | F      | AA                |
| MRNAC024                        | S69                               |       |        | 14     | F      | H                 |
| MRNAC028                        | S79                               |       |        | 17     | F      | H                 |
| MRNAC029                        | S105                              |       |        | 16     | M      | C                 |

<sup>a</sup>RNA was prepared from the indicated controls with the identifier defined in the methods.

<sup>b</sup>The MiR Array identifier refers to the array data

<sup>c</sup>Abbreviations for race include: Hispanic (H), Caucasian (C), African American (AA)

<sup>d</sup>MRNAC001.3a is a second, independent sample draw from normal control MRNAC001.

**Table 2** Differential miR expression between normal controls and 22q11.2 deletion syndrome patients

| MicroRNA       | Normal  |       | 22q11.2 |      | p-value<br>(T-test) | p-value <sup>a</sup><br>(associative) | Ratio <sup>c</sup> |
|----------------|---------|-------|---------|------|---------------------|---------------------------------------|--------------------|
|                | Average | SD    | Average | SD   |                     |                                       |                    |
| hsa-miR-185    | 7655    | 2810  | 2794    | 1238 | 1.15E-11            | 0.00E+00 <sup>b</sup>                 | 0.37               |
| hsa-miR-1308   | 66      | 101   | 26      | 22   | 3.61E-02            | 0.00E+00 <sup>b</sup>                 | 0.40               |
| hsa-miR-720    | 851     | 993   | 336     | 204  | 6.07E-03            | 5.46E-11                              | 0.39               |
| hsa-let-7b     | 3722    | 4770  | 1246    | 789  | 5.58E-03            | 8.95E-10                              | 0.33               |
| hsa-miR-150    | 12808   | 11015 | 5925    | 3090 | 1.46E-03            | 1.50E-08                              | 0.46               |
| hsa-let-7i     | 3368    | 2217  | 1989    | 1213 | 4.83E-03            | 3.02E-05                              | 0.59               |
| hsa-miR-93     | 1315    | 784   | 865     | 563  | 1.76E-02            | 6.08E-05                              | 0.66               |
| hsa-let-7g     | 3122    | 2486  | 1849    | 899  | 1.02E-02            | 1.18E-04                              | 0.59               |
| hsa-let-7a     | 11225   | 13898 | 5251    | 1731 | 1.93E-02            | 3.46E-04                              | 0.47               |
| hsa-let-7c     | 5311    | 7437  | 1971    | 957  | 1.48E-02            | 7.82E-04                              | 0.37               |
| hsa-miR-1275   | 51      | 46    | 30      | 27   | 3.79E-02            | 1.78E-03                              | 0.58               |
| hsa-miR-15b-3p | 35      | 33    | 113     | 95   | 5.02E-04            | 0.00E+00 <sup>b</sup>                 | 3.24               |
| hsa-miR-21     | 41      | 53    | 153     | 251  | 4.48E-02            | 4.47E-09                              | 3.71               |
| hsa-miR-194    | 134     | 102   | 267     | 198  | 5.42E-03            | 1.94E-08                              | 2.00               |
| hsa-miR-324-5p | 182     | 65    | 336     | 278  | 1.42E-02            | 1.35E-07                              | 1.84               |
| hsa-miR-363    | 650     | 364   | 1040    | 560  | 5.89E-03            | 8.40E-06                              | 1.60               |
| hsa-miR-23b    | 1039    | 490   | 1588    | 677  | 1.99E-03            | 3.63E-04                              | 1.53               |
| hsa-miR-361-5p | 188     | 87    | 301     | 218  | 2.47E-02            | 3.08E-03                              | 1.60               |

<sup>a</sup>Associative p values were calculated using methodologies described in the methods

<sup>b</sup>Associative p values <10<sup>-12</sup>

<sup>c</sup>Ratio is determined by dividing normal miR levels by that seen in the DiGeorge samples

Table 3

| Patient    | Age Yrs | Sex | Race       | Facial dysmorphism | FISH 22Q11 | Kidney Problems or Renal Anomalies      | Auto-immunity    | CD3 percent | CD3 Absolute # | LTM PHA | LTM ConA | LTM PWM | LTA Candida | LTA Tetanus | IgG  | IgA  | IgM |
|------------|---------|-----|------------|--------------------|------------|-----------------------------------------|------------------|-------------|----------------|---------|----------|---------|-------------|-------------|------|------|-----|
| MRNAP003.1 | 4       | F   | Hispanic   | Yes                | Yes        | proteinuria/HTN                         | No               | 35.3        | 1257           | Normal  | Normal   | Normal  | Normal      | Normal      | 983  | 97   | 123 |
| MRNAP004.1 | 4       | M   | Hispanic   | Yes                | Yes        | No                                      | No               | 39.1        | 2457           | Normal  | Normal   | Normal  | Normal      | Low         | 601  | 28   | 36  |
| MRNAP008.1 | 9       | M   | Caucasian  | Yes                | Yes        | No                                      | No               | 58.8        | 1088           | Normal  | Normal   | Normal  | Low         | Normal      | 447  | 29.5 | 33  |
| MRNAP011.1 | 2       | F   | Hispanic   | Yes                | Yes        | Duplicated bladder, dysplastic R kidney | No               | 66.3        | 3404           | Normal  | Normal   | Normal  | Normal      | low         | 1030 | 57   | 179 |
| MRNAP013.1 | 9       | F   | Hispanic   | Yes                | Yes        | No                                      | No               | 53          | 1342           | Low     | Low      | Low     | Normal      | Normal      | 884  | 104  | 71  |
| MRNAP014.1 | 2       | M   | Hispanic   | Yes                | Yes        | No                                      | No               | 37.95       | 666            | Normal  | Normal   | Normal  | Normal      | Low         | 652  | 49   | 54  |
| MRNAP017.1 | 4       | M   | Afr. Amer. | Yes                | Yes        | No                                      | No               | 32.38       | 1287           | Normal  | Normal   | Normal  | Normal      | Low         | 1003 | 43   | 55  |
| MRNAP018.1 | 10      | F   | Afr. Amer. | Yes                | Yes        | No                                      | No               | 58.6        | 1369           | Normal  | Normal   | Low     | Normal      | Normal      | 1470 | 210  | 60  |
| MRNAP021.1 | 1       | F   | Hispanic   | Yes                | Yes        | transient renal insuff.                 | No               | 39          | 2018           | Low     | Low      | Low     | Low         | Low         | 672  | 42   | 68  |
| MRNAP022.1 | 3       | M   | Caucasian  | Yes                | Yes        | No                                      | No               | 37.3        | 903            | Normal  | Normal   | Normal  | Normal      | Normal      | 461  | 31   | 85  |
| MRNAP027.1 | 2       | M   | Hispanic   | Yes                | Yes        | No                                      | No               | 48          | 2203           | Normal  | Normal   | Normal  | Normal      | Normal      | 819  | 77   | 37  |
| MRNAP028.1 | 10      | M   | Caucasian  | Yes                | Yes        | No                                      | No               | 28.44       | 356            | Low     | Low      | Low     | Normal      | Normal      | 757  | 118  | 50  |
| MRNAP029.1 | 1       | M   | Hispanic   | Yes                | Yes        | No                                      | No               | 58.9        | 2009           | Normal  | Normal   | Normal  | Low         | NA          | 615  | 13   | 27  |
| MRNAP030.1 | 6       | F   | Caucasian  | Yes                | Yes        | No                                      | No               | 52.3        | 333            | Low     | Low      | Low     | Low         | Low         | 964  | 148  | 68  |
| MRNAP034.1 | 1       | F   | Hispanic   | Yes                | Yes        | No                                      | No               | 27.25       | 1206           | Normal  | Normal   | Normal  | low         | Normal      | 510  | 65   | 60  |
| MRNAP035.1 | 1       | F   | Caucasian  | Yes                | Yes        | No                                      | No               | 41.5        | 1427           | Normal  | Normal   | Normal  | Normal      | Normal      | 281  | 14.5 | 40  |
| MRNAP039.1 | 4       | F   | Hispanic   | Yes                | Yes        | No                                      | No               | 47.95       | 1159           | Normal  | Normal   | Normal  | Low         | Low         | 853  | 58   | 86  |
| MRNAP040.1 | 10      | M   | Hispanic   | Yes                | Yes        | No                                      | No               | 11.15       | 71             | Low     | Low      | Low     | Low         | Low         | 140  | 35   | 27  |
| MRNAP041.1 | 15      | F   | Caucasian  | Yes                | Yes        | No                                      | No               | 44.8        | 1280           | Normal  | Normal   | Normal  | Normal      | Normal      | 864  | 81   | 67  |
| MRNAP042.1 | 0.75    | F   | Hispanic   | Yes                | Yes        | transient renal insuff.                 | No               | 33.2        | 1355           | Normal  | Low      | low     | low         | Normal      | 616  | 26   | 72  |
| MRNAP043.1 | 5       | F   | Caucasian  | Yes                | Yes        | solitary kidney                         | No               | 58.9        | 2625           | Low     | Low      | Low     | Normal      | Normal      | 1060 | 126  | 57  |
| MRNAP044.1 | 9       | F   | Caucasian  | Yes                | Yes        | No                                      | No               | 64.17       | 1049           | Normal  | Normal   | Normal  | Normal      | Normal      | 888  | 16   | 36  |
| MRNAP046.1 | 7       | M   | Caucasian  | Yes                | Yes        | Horseshoe kidney                        | No               | 50.8        | 1493           | Normal  | Normal   | Normal  | Normal      | Normal      | 627  | 105  | 40  |
| MRNAP047.1 | 0.25    | F   | Hispanic   | Yes                | Yes        | No                                      | No               | 38.3        | 1972           | Normal  | low      | normal  | low         | low         | 562  | 42   | 131 |
| MRNAP048.1 | 0.25    | F   | Caucasian  | Yes                | Yes        | No                                      | No               | 33          | 1333           | Normal  | Normal   | Normal  | Normal      | Normal      | 749  | 17   | 25  |
| MRNAP052.1 | 0.25    | F   | Hispanic   | Yes                | Yes        | bilateral hydronephrosis                | No               | 61          | 1454           | Normal  | normal   | NA      | NA          | NA          | 178  | 16   | 122 |
| MRNAP053.1 | 4       | F   | Caucasian  | Yes                | Yes        | NA                                      | No               | 49.3        | 1350           | normal  | normal   | normal  | normal      | low         | 566  | 75   | 71  |
| MRNAP058.1 | 0.08    | F   | Caucasian  | Yes                | Yes        | No                                      | No               | 35.4        | 524            | NA      | NA       | NA      | NA          | NA          | 203  | <6   | 8   |
| MRNAP059.1 | 9       | M   | Hispanic   | Yes                | Yes        | NA                                      | No               | 53.4        | 1875           | Normal  | Normal   | Normal  | Normal      | Normal      | 1840 | 324  | 68  |
| MRNAP060.1 | 17      | F   | Caucasian  | Yes                | Yes        | NA                                      | Yes <sup>a</sup> | 79.8        | 668            | Normal  | Low      | Low     | Normal      | Normal      | 680  | 78   | 21  |
| MRNAP069.1 | 15      | F   | Caucasian  | Yes                | Yes        | NA                                      | No               | 58.6        | 1079           | Normal  | Normal   | Normal  | Normal      | Normal      | NA   | NA   | NA  |

<sup>a</sup>Thrombocytopenia
