# Supplementary material
Source: PubMed Central journal article supplement (PMC3748608)

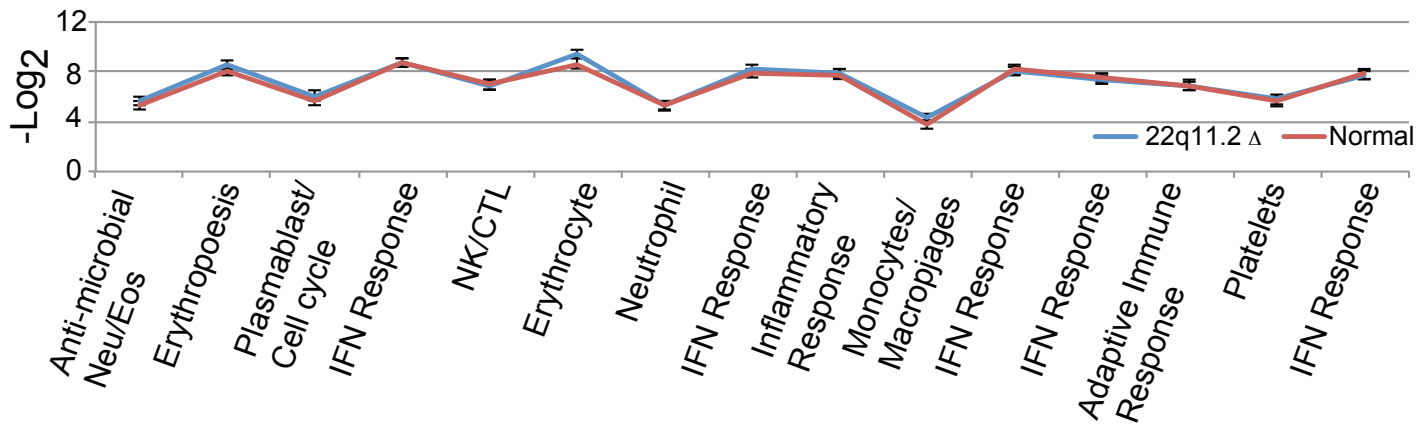

A

## Gene Level Expression- Normalized to Median

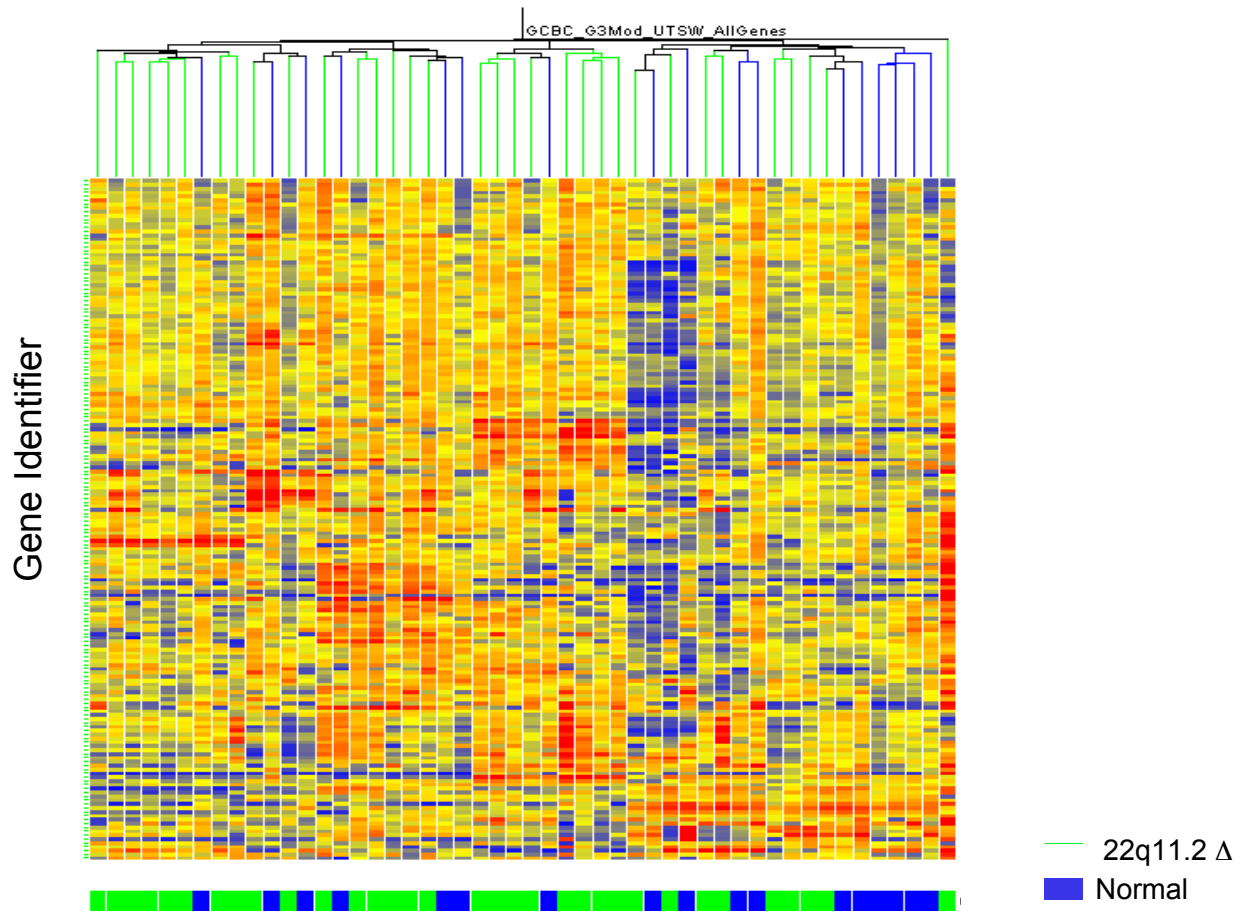

B

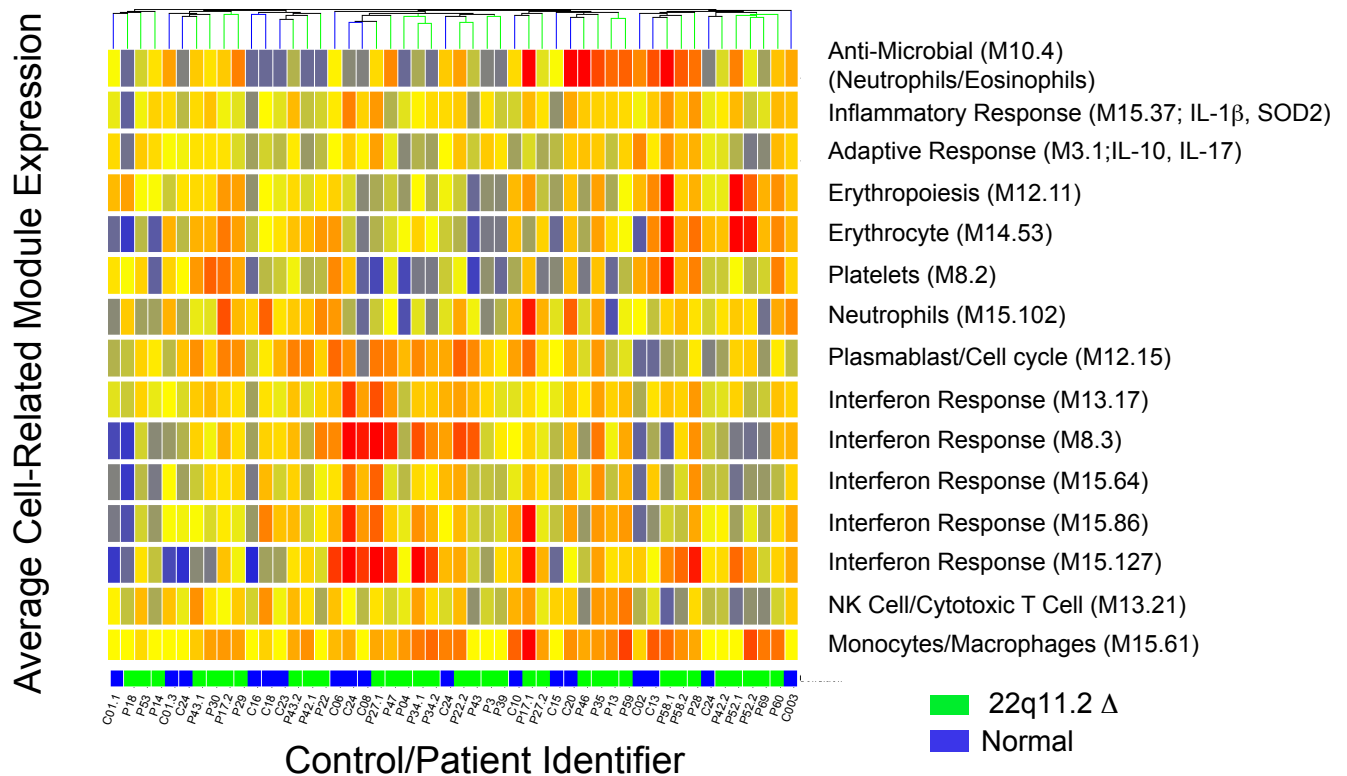

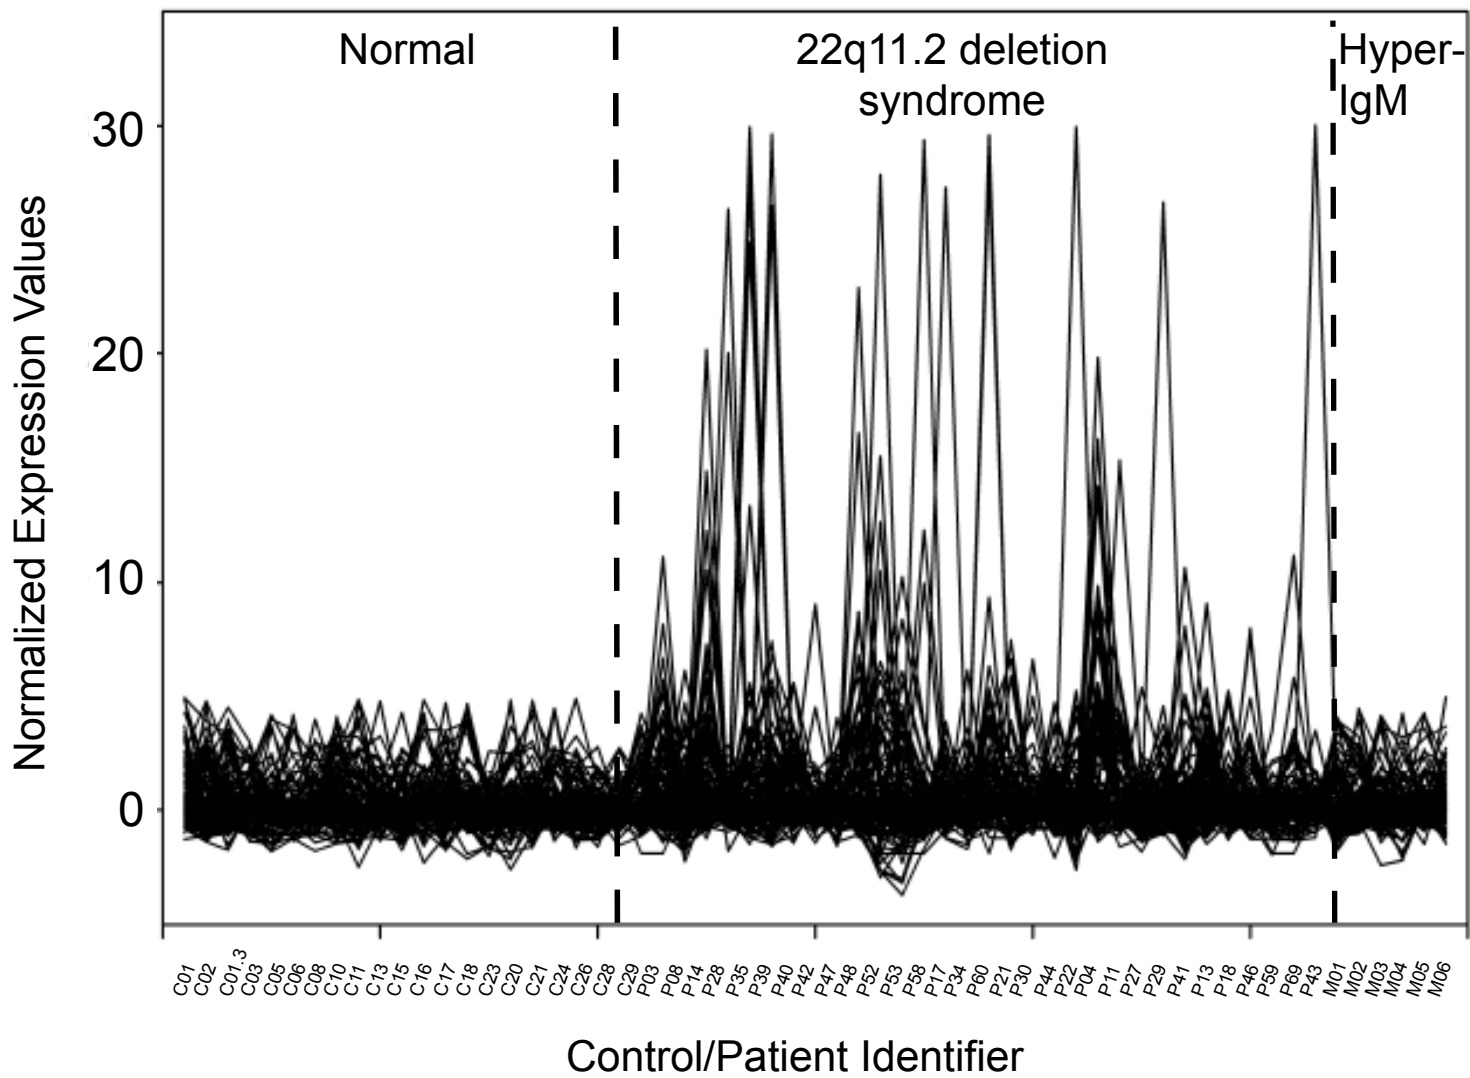

Supplement: NIHMS441887-supplement-01.pdf [file NIHMS441887-supplement-01.pdf]
